# Supplementary material
Source: publisher figshare collection journal article supplement (https://frontiersin.figshare.com/ndownloader/files/25528220)

**Supplementary Figure S2.** Sequence analysis of *VrSE1* in mungbean. **(A)** Sequence alignment of *VrSE1* coding region in different mungbean lines (*se1* mutant, KPS1, KPS2, *jilv7* and ACC41), the substitution is indicated in pink color. **(B)** Neighbor-joining tree of DUF1005 family members in mungbean. **(C)** Intracellular localization of VrDUF1005 in *Nicotiana benthamiana* leaves. GFP, fluorescence of the fusion protein; Nucleus, fluorescence of nucleus marker; Bright, bright-field; Merged, overlay of previous images. Bars=30  $\mu$ m.

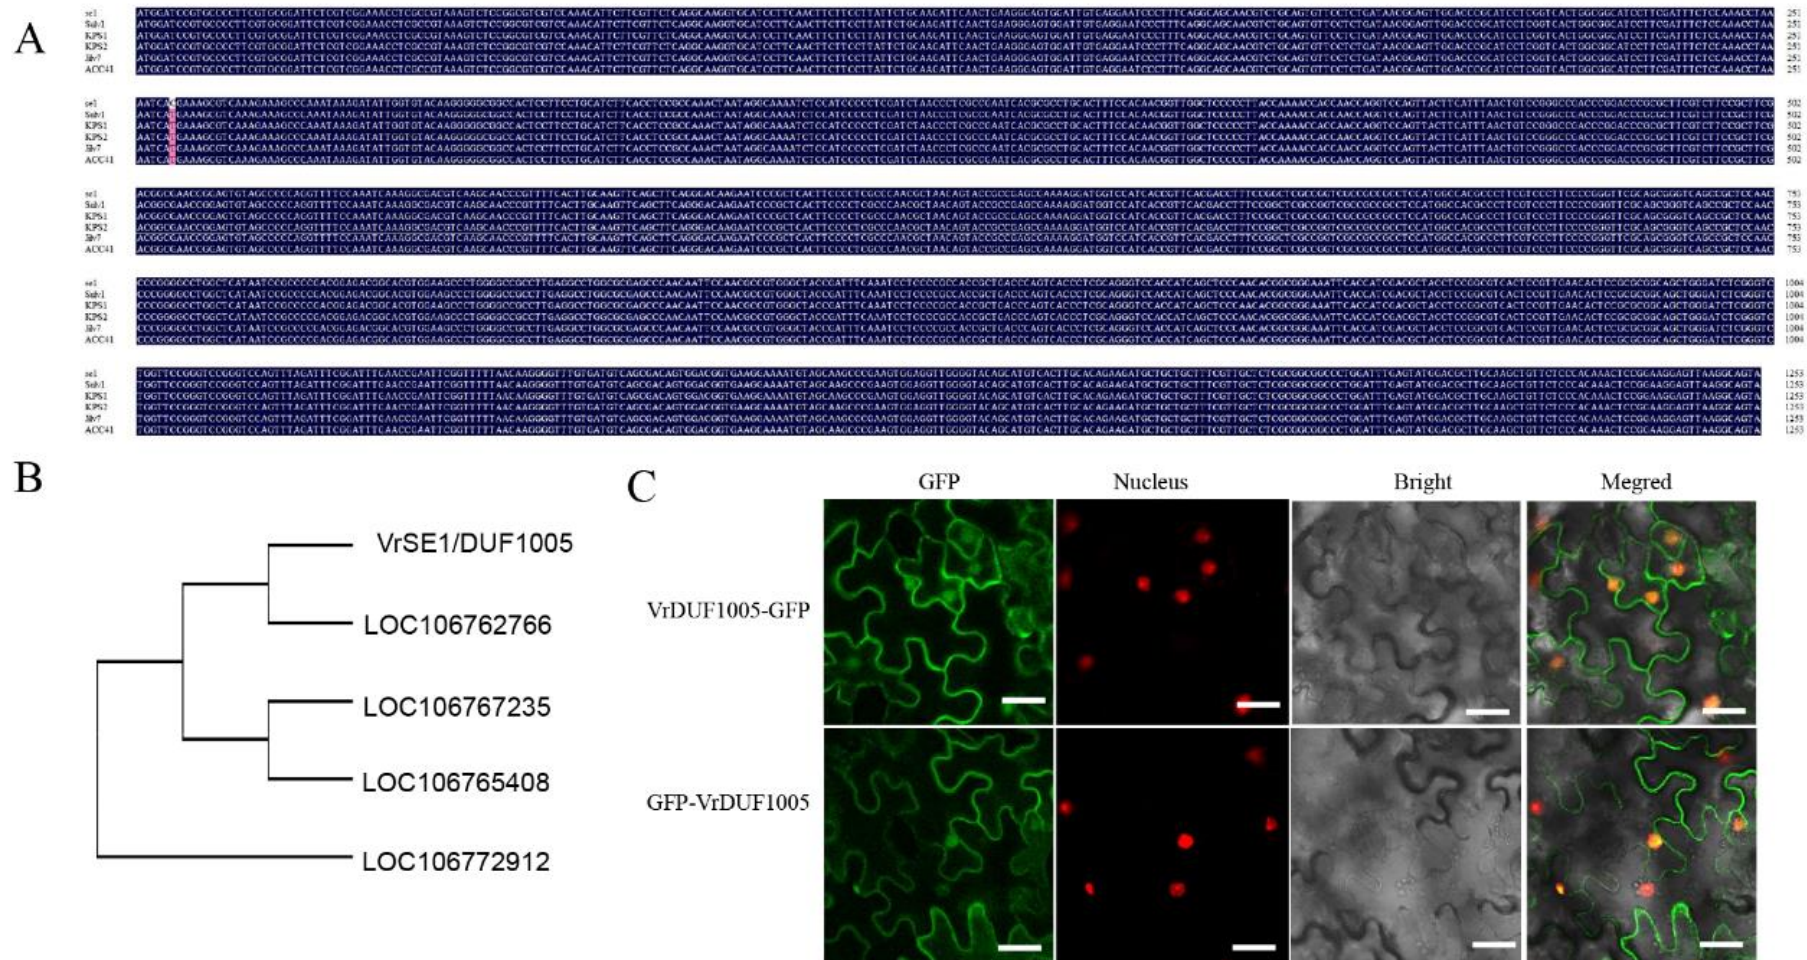

Supplement: Supplementary file [file 25528220]
